# Supplementary material for: Structural characterization of EGFR exon 19 deletion mutation using molecular dynamics simulation
Source: PubMed Central journal article supplement (PMC6752865; doi:10.1371/journal.pone.0222814), 2019-09-19
Supplement: pone.0222814.s001.pdf [file pone.0222814.s001.pdf]

|                                               | <b>Apo active EGFR</b> | <b>Apo inactive EGFR</b> | <b>ATP-bound active EGFR</b> |
|-----------------------------------------------|------------------------|--------------------------|------------------------------|
| <b>Principal structure</b>                    | 2GS2 [1]               | 2GS7 [1]                 | 2ITX [2]                     |
| <b>Structures used to build missing loops</b> | 1M14 [3] (723-725)     | 3W2S [4] (958-984)       | 2GS6 [1] (862-865)           |
|                                               | 3W2S [4] (967-981)     | 4HJO [5] (848-850)       | 3W2S [4] (990-1001)          |

- Numbers in bracket correspond to the range of amino acids missing from the principal structure which were then built using the indicated PDB structure.

## References

1. Zhang X, Gureasko J, Shen K, Cole PA, Kuriyan J. An Allosteric Mechanism for Activation of the Kinase Domain of Epidermal Growth Factor Receptor. *Cell*. 2006;125(6):1137–49.
2. Yun C-H, Boggon TJ, Li Y, Woo MS, Greulich H, Meyerson M, et al. Structures of lung cancer-derived EGFR mutants and inhibitor complexes: mechanism of activation and insights into differential inhibitor sensitivity. *Cancer Cell*. 2007;11(3):217–27
3. Stamos J, Sliwkowski MX, Eigenbrot C. Structure of the epidermal growth factor receptor kinase domain alone and in complex with a 4-anilinoquinazoline inhibitor. *J Biol Chem*. 2002;277(48):46265–72.
4. Sogabe S, Kawakita Y, Igaki S, Iwata H, Miki H, Cary DR, et al. Structure-Based Approach for the Discovery of Pyrrolo[3,2-*d*]pyrimidine-Based EGFR T790M/L858R Mutant Inhibitors. *ACS Med Chem Lett*. 2013;4(2):201–5.
5. Park JH, Liu Y, Lemmon MA, Radhakrishnan R. Erlotinib binds both inactive and active conformations of the EGFR tyrosine kinase domain. *Biochem J*. 2012;448(3):417–23.
