# Supplementary material for: Structural characterization of EGFR exon 19 deletion mutation using molecular dynamics simulation
Source: PubMed Central journal article supplement (PMC6752865; doi:10.1371/journal.pone.0222814), 2019-09-19
Supplement: pone.0222814.s002.pdf [file pone.0222814.s002.pdf]

**(A) Hydrogen bond interactions between ATP and wild-type EGFR during the simulation**

| Acceptor    | DonorH       | Donor       | Fraction | AvgDist (Å) | AvgAng   |
|-------------|--------------|-------------|----------|-------------|----------|
| ATP@N1      | MET_793@H    | MET_793@N   | 0.9756   | 3.077       | 163.8957 |
| GLN_791@O   | ATP@HN61     | ATP@N6      | 0.9668   | 2.904       | 157.554  |
| ATP@O2B     | LYS_745@HZ2  | LYS_745@NZ  | 0.3312   | 2.8153      | 155.942  |
| ATP@O2B     | LYS_745@HZ3  | LYS_745@NZ  | 0.312    | 2.8125      | 155.8344 |
| ATP@O2B     | LYS_745@HZ1  | LYS_745@NZ  | 0.2664   | 2.8155      | 156.1433 |
| THR_790@OG1 | ATP@HN62     | ATP@N6      | 0.1444   | 3.2063      | 144.6647 |
| ATP@O2'     | CYS_797@H    | CYS_797@N   | 0.0736   | 3.0973      | 148.4985 |
| ATP@O1B     | ALA_722@H    | ALA_722@N   | 0.0572   | 2.8777      | 159.0192 |
| ATP@O3G     | ARG_841@HH12 | ARG_841@NH1 | 0.0128   | 2.8031      | 147.8435 |
| ATP@N6      | THR_790@HG1  | THR_790@OG1 | 0.0112   | 3.3476      | 143.7813 |
| ATP@O3G     | ARG_841@HH11 | ARG_841@NH1 | 0.0096   | 2.8841      | 158.3484 |
| ATP@O3B     | ALA_722@H    | ALA_722@N   | 0.0072   | 3.3741      | 144.7664 |
| ATP@O2G     | LYS_875@HZ1  | LYS_875@NZ  | 0.0064   | 2.8039      | 149.2692 |
| ATP@O2G     | LYS_745@HZ2  | LYS_745@NZ  | 0.006    | 2.8975      | 148.5305 |
| ASP_800@OD2 | ATP@HO3'     | ATP@O3'     | 0.0052   | 2.748       | 156.2707 |
| ATP@O2G     | LYS_875@HZ2  | LYS_875@NZ  | 0.0048   | 2.7931      | 149.3414 |
| ATP@O2G     | LYS_875@HZ3  | LYS_875@NZ  | 0.0036   | 2.7615      | 157.9891 |
| ASP_800@OD2 | ATP@HO2'     | ATP@O2'     | 0.0028   | 2.7259      | 160.576  |
| ATP@O2G     | LYS_745@HZ1  | LYS_745@NZ  | 0.0024   | 2.9571      | 149.3977 |
| ATP@O1B     | LYS_745@HZ2  | LYS_745@NZ  | 0.0024   | 3.2319      | 138.4561 |
| ATP@O3G     | ARG_841@HH22 | ARG_841@NH2 | 0.0016   | 2.8129      | 148.4546 |
| ATP@O1B     | LYS_745@HZ1  | LYS_745@NZ  | 0.0012   | 3.1913      | 139.7704 |
| ATP@O1B     | LYS_745@HZ3  | LYS_745@NZ  | 0.0008   | 3.082       | 137.5614 |
| LEU_718@O   | ATP@HO3'     | ATP@O3'     | 0.0008   | 3.1931      | 149.6899 |
| ATP@O3G     | LYS_875@HZ3  | LYS_875@NZ  | 0.0004   | 2.759       | 165.0465 |
| ATP@O3G     | LYS_875@HZ1  | LYS_875@NZ  | 0.0004   | 3.1878      | 139.6111 |
| ATP@O3B     | LYS_745@HZ1  | LYS_745@NZ  | 0.0004   | 3.2073      | 138.2237 |
| ASP_800@OD1 | ATP@HO3'     | ATP@O3'     | 0.0004   | 3.3342      | 151.252  |
| ATP@N6      | MET_793@H    | MET_793@N   | 0.0004   | 3.4578      | 146.4073 |
| MET_793@N   | ATP@HN61     | ATP@N6      | 0.0004   | 3.4885      | 142.3253 |

**(B) Hydrogen bond interactions between ATP and  $\Delta$ ELREA EGFR during the simulation**

| Acceptor    | DonorH       | Donor       | Fraction | AvgDist (Å) | AvgAng   |
|-------------|--------------|-------------|----------|-------------|----------|
| ATP@N1      | MET_793@H    | MET_793@N   | 0.9532   | 3.1257      | 160.9542 |
| GLN_791@O   | ATP@HN62     | ATP@N6      | 0.898    | 2.9118      | 152.487  |
| ATP@O3G     | ARG_841@HH12 | ARG_841@NH1 | 0.2856   | 2.8131      | 153.0624 |
| ATP@O3G     | ARG_841@HH22 | ARG_841@NH2 | 0.2504   | 2.8237      | 151.3491 |
| ATP@O2A     | LYS_745@HZ2  | LYS_745@NZ  | 0.196    | 2.8317      | 160.1432 |
| ATP@O2B     | LYS_745@HZ1  | LYS_745@NZ  | 0.1696   | 2.775       | 157.0436 |
| ATP@O2A     | LYS_745@HZ1  | LYS_745@NZ  | 0.1576   | 2.8509      | 160.5126 |
| ATP@O2B     | LYS_745@HZ2  | LYS_745@NZ  | 0.1492   | 2.7799      | 157.8499 |
| ATP@O2B     | LYS_745@HZ3  | LYS_745@NZ  | 0.1396   | 2.7816      | 155.9859 |
| ATP@O2A     | LYS_745@HZ3  | LYS_745@NZ  | 0.1224   | 2.8502      | 159.5042 |
| THR_790@OG1 | ATP@HN61     | ATP@N6      | 0.1192   | 3.1592      | 146.1309 |
| ATP@O3G     | ARG_841@HE   | ARG_841@NE  | 0.1068   | 2.8846      | 158.6177 |
| ATP@O2G     | ARG_841@HH21 | ARG_841@NH2 | 0.0948   | 2.8545      | 159.6861 |
| ATP@O1B     | ALA_727@H    | ALA_727@N   | 0.0764   | 2.907       | 159.3931 |
| ATP@O2'     | CYS_797@H    | CYS_797@N   | 0.0392   | 3.0809      | 149.0063 |
| ATP@O3G     | ARG_841@HH21 | ARG_841@NH2 | 0.0388   | 2.9209      | 149.4318 |
| ATP@O1B     | LYS_745@HZ1  | LYS_745@NZ  | 0.0376   | 3.0293      | 147.9211 |
| ATP@O1B     | LYS_745@HZ3  | LYS_745@NZ  | 0.0364   | 2.9979      | 146.6659 |
| ATP@O2G     | LYS_875@HZ1  | LYS_875@NZ  | 0.022    | 2.7695      | 157.0207 |
| ATP@O1B     | LYS_745@HZ2  | LYS_745@NZ  | 0.0188   | 3.0996      | 146.4626 |
| ATP@O3B     | ALA_722@H    | ALA_722@N   | 0.0172   | 3.3155      | 147.5082 |
| ATP@O2G     | ARG_841@HE   | ARG_841@NE  | 0.0144   | 3.2149      | 140.7642 |
| ATP@O2G     | LYS_875@HZ3  | LYS_875@NZ  | 0.0136   | 2.7549      | 158.395  |
| ATP@O2G     | LYS_875@HZ2  | LYS_875@NZ  | 0.0132   | 2.8008      | 156.0448 |
| ATP@O3G     | LYS_875@HZ2  | LYS_875@NZ  | 0.0112   | 2.8231      | 161.1563 |
| ATP@O3G     | LYS_875@HZ3  | LYS_875@NZ  | 0.006    | 2.8272      | 158.5374 |
| ATP@O2G     | ARG_841@HH22 | ARG_841@NH2 | 0.0052   | 2.966       | 161.2113 |
| ATP@O3G     | LYS_875@HZ1  | LYS_875@NZ  | 0.0048   | 2.7511      | 156.6571 |
| ATP@O1B     | GLY_721@H    | GLY_721@N   | 0.004    | 3.1913      | 142.8719 |
| MET_793@N   | ATP@HN62     | ATP@N6      | 0.0028   | 3.3922      | 140.3938 |
| ATP@N6      | THR_790@HG1  | THR_790@OG1 | 0.0024   | 3.2136      | 143.7323 |
| ATP@O1A     | LYS_745@HZ3  | LYS_745@NZ  | 0.0008   | 2.8898      | 145.5669 |
| LEU_718@O   | ATP@HO3'     | ATP@O3'     | 0.0008   | 3.1155      | 143.8834 |
| ATP@O3A     | LYS_745@HZ2  | LYS_754@NZ  | 0.0008   | 3.4091      | 141.9069 |
| ATP@O3A     | LYS_745@HZ1  | LYS_745@NZ  | 0.0008   | 3.4405      | 142.7711 |
| ATP@N6      | MET_793@H    | MET_793@N   | 0.0008   | 3.4736      | 149.4192 |
| ASP_800@OD1 | ATP@HO3'     | ATP@O3'     | 0.0004   | 2.6742      | 159.1776 |
| ATP@O5'     | LYS_745@HZ1  | LYS_745@NZ  | 0.0004   | 3.0766      | 141.6863 |

|         |             |            |        |        |          |
|---------|-------------|------------|--------|--------|----------|
| ATP@O1A | LYS_745@HZ2 | LYS_745@NZ | 0.0004 | 3.1242 | 149.4501 |
| ATP@O1B | PHE_723@H   | PHE_723@N  | 0.0004 | 3.1336 | 156.1012 |
